# Supplementary material for: Pharmacophore-Based Virtual Screening, Quantum Mechanics Calculations, and Molecular Dynamics Simulation Approaches Identified Potential Natural Antiviral Drug Candidates against MERS-CoV S1-NTD
Source: MDPI journal article supplement (doi:10.3390/molecules26164961), 2021-08-17
Supplement: s1 [file s1]

*Supplementary Table on*

**Pharmacophore-based virtual screening, quantum mechanics calculations, and molecular dynamics simulation approaches identified potential natural antiviral drug candidates against MERS-CoV S1-NTD.**

Thamer Ahmad Bouback <sup>1</sup>, Abdulaziz Albeshri <sup>1</sup>, Amal Mohammed Aljohani <sup>1</sup>, Abdus Samad <sup>2,3</sup>, Rahat Alam <sup>2,3</sup>, Md Saddam Hossen <sup>2,3,4</sup>, Khalid Al-Ghamdi <sup>1</sup>, Foysal Ahammad <sup>1,2,3,\*</sup>, Ishtiaq Qadri <sup>1,\*\*</sup>

**Table S1:** A list of 32 compounds generated as hits during pharmacophore based virtual screening process with there geometric fit score, conformation number and binding affinity (kcal/mol) with desire protein.

| Compound Name | Pharmacophore Fit Score | Number of conformations | Binding Affinity |
|---------------|-------------------------|-------------------------|------------------|
| Amb6600135    | 66.6                    | 25                      | -9.2             |
| Amb23604132   | 65.48                   | 25                      | -9.1             |
| Amb23604659   | 65.55                   | 25                      | -8.6             |
| Amb1153724    | 66.64                   | 25                      | -8.1             |
| Amb24326239   | 67.57                   | 25                      | -8.0             |
| Amb22172700   | 67.12                   | 12                      | -7.7             |
| Amb22407028   | 67.12                   | 8                       | -7.7             |
| Amb19746939   | 67.51                   | 25                      | -7.6             |
| Amb24326238   | 66.88                   | 25                      | -7.6             |
| Amb28533232   | 65.46                   | 25                      | -7.6             |
| Amb21855756   | 66.6                    | 25                      | -7.5             |
| Amb22407027   | 67.12                   | 14                      | -7.5             |
| Amb22735040   | 66.88                   | 25                      | -7.5             |
| Amb22800823   | 66.21                   | 25                      | -7.5             |
| Amb29085648   | 66                      | 16                      | -7.5             |
| Amb22888458   | 66.84                   | 25                      | -7.4             |
| Amb29085659   | 67.1                    | 25                      | -7.4             |
| Amb29085660   | 66.85                   | 25                      | -7.4             |
| Amb22584586   | 66.83                   | 25                      | -7.3             |
| Amb18003253   | 66.77                   | 25                      | -7.2             |
| Amb29085723   | 66.83                   | 25                      | -7.2             |
| Amb19886350   | 67.46                   | 25                      | -7.1             |
| Amb19893465   | 66.38                   | 25                      | -7.1             |
| Amb24323825   | 66.81                   | 25                      | -7.1             |
| Amb28532929   | 66.59                   | 25                      | -7.1             |
| Amb29085710   | 67.75                   | 25                      | -7.1             |
| Amb19928430   | 65.71                   | 9                       | -6.9             |
| Amb22584350   | 66.54                   | 25                      | -6.9             |
| Amb22888476   | 66.95                   | 25                      | -6.9             |
| Amb22896309   | 66.27                   | 25                      | -6.7             |
| Amb8514723    | 66.58                   | 25                      | -6.6             |
| Amb22584735   | 66.63                   | 25                      | -6.4             |

**Table S2:** List of HOMO, LUMO, HOMO-LUMO gap, softness and hardness of the selected three compound.

| Compound Name | HOMO (a.u) | LUMO (a.u) | Area (HOMO) | Area (LUMO) | HLG (a.u) | Softness | Hardness | Iso-value |
|---------------|------------|------------|-------------|-------------|-----------|----------|----------|-----------|
| Amb1153724    | -0.207     | -0.0425    | 70.947      | 62.03       | 0.1645    | 0.0822   | 12.157   | -0.05     |
| Amb23604132   | -0.211     | -0.079     | 107.067     | 85.507      | 0.1326    | 0.0663   | 15.084   | -0.05     |
| Amb23604659   | -0.217     | -0.057     | 120.442     | 58.779      | 0.1601    | 0.0801   | 12.488   | -0.05     |

**Table S3:** List of MM/GBSA component and their energy with standard error value of the selected three compound.

| Compound Name | $\Delta G$ Bind | $\Delta G$ Bind Coulomb | $\Delta G$ Bind Covalent | $\Delta G$ Bind Hbond | $\Delta G$ Bind Lipo | $\Delta G$ Bind Packing | $\Delta G$ Bind Solv GB | $\Delta G$ Bind vdW |
|---------------|-----------------|-------------------------|--------------------------|-----------------------|----------------------|-------------------------|-------------------------|---------------------|
| Amb1153724    | -32.47 $\pm$ 6  | -22.45 $\pm$ 4          | 2.5 $\pm$ 1              | -2.08 $\pm$ 1         | -7.51 $\pm$ 3        | -6.91 $\pm$ 2           | 16.2 $\pm$ 4            | -14.22 $\pm$ 4      |
| Amb23604132   | -24.75 $\pm$ 4  | -12.25 $\pm$ 5          | 1.41 $\pm$ .5            | -1.01 $\pm$ .6        | -7.28 $\pm$ 2        | -9.79 $\pm$ 3           | 16.28 $\pm$ 5           | -10.3 $\pm$ 3       |
| Amb23604659   | -26.18 $\pm$ 5  | -6.43 $\pm$ 4           | 1.7 $\pm$ .6             | -1.04 $\pm$ .5        | -5.4 $\pm$ 3         | -5.86 $\pm$ 1           | 10.03 $\pm$ 3           | -17.78 $\pm$ 7      |
